# Supplementary material for: Oncoprotein 18 is necessary for malignant cell proliferation in bladder cancer cells and serves as a G3-specific non-invasive diagnostic marker candidate in urinary RNA
Source: PubMed Central journal article supplement (PMC7332083; doi:10.1371/journal.pone.0229193), 2020-07-02

ECV-304

| days after transfection | c | control-siRNA |   |   |   | M | OP18-siRNA |   |   |   |
|-------------------------|---|---------------|---|---|---|---|------------|---|---|---|
|                         | 0 | 1             | 2 | 3 | 4 |   | 1          | 2 | 3 | 4 |

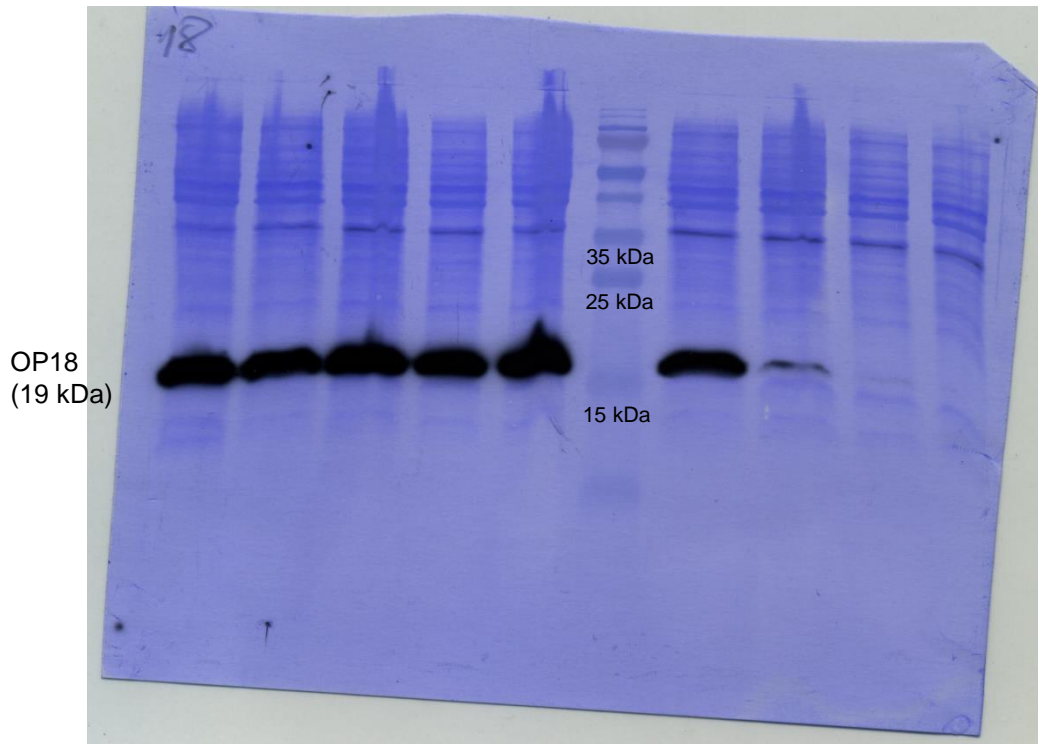

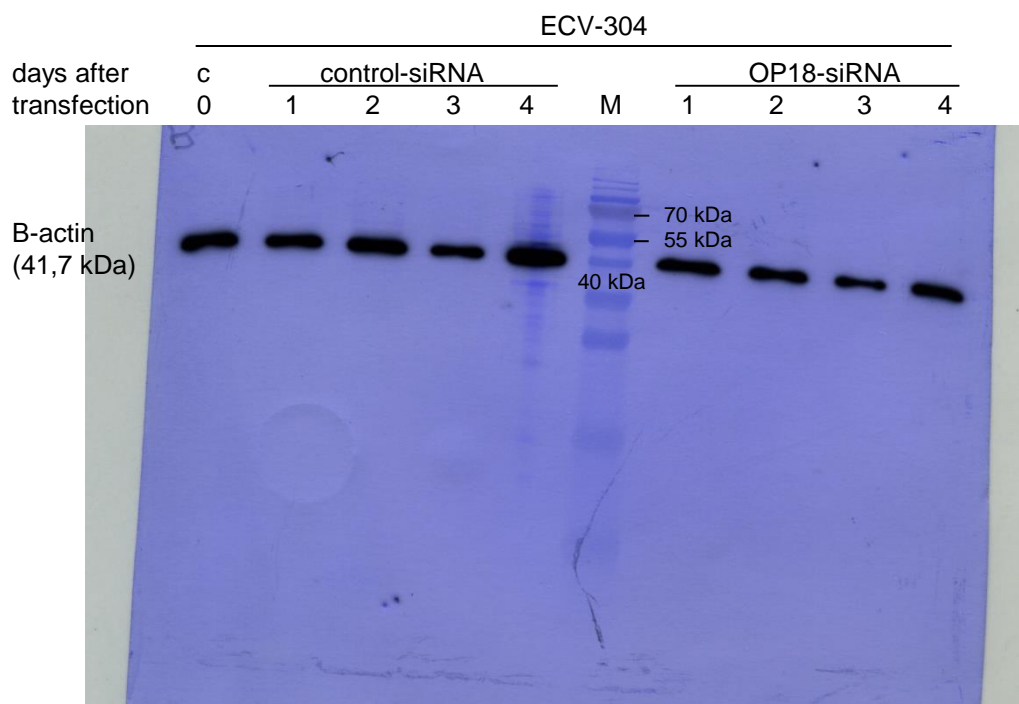

Supplement: pone.0229193.s004.pdf [file pone.0229193.s004.pdf]
